# Supplementary material
Source: Springer Nature journal article supplement (https://www.springermedizin.de/resource/supplementary/13256_2012_2354_MOESM3_ESM.pdf/9649610)
Supplement: MOESM3 [file 9649610]

| Table 1                                        |     |                                 |                   |                                        |                              |                                      | Reference Number |
|------------------------------------------------|-----|---------------------------------|-------------------|----------------------------------------|------------------------------|--------------------------------------|------------------|
| Presenting symptoms                            | Age | Prior History of Cancer         | Radiological Test | Reported findings                      | Other Lab test               | Biopsy/ Autopsy results              |                  |
| Jaundice, vomiting, abdominal pain             | 56  | Ductal carcinoma 9 months prior | CT                | No abdominal lesions                   | Increased LFTs               | Squamous cancer                      | 1                |
| Anorexia and general fatigue                   | 66  | Myxoid fungoides                | CT & US           | Normal liver                           | 20 fold increased LFTs       | Myxoid fungoides                     | 10               |
| Acid fever with elevated LFTs                  | 58  | None                            | CT-               | Hepatomegaly                           | Elevated LFTs, low BUN & BCT | Peripheral T-cell lymphoma           | 12               |
| Abdominal pain, decreased appetite             | 58  | None                            | CT and US         | Hepatomegaly and ascites               | Low BCT                      | Small-cell lung cancer               | 13               |
| Increasing ascites, jaundice, and hematochezia | 54  | Breast cancer 8 yrs prior       | CT US             | Probable benign cysts, ascites         | Elevated LFTs                | Poorly differentiated adenocarcinoma | 4                |
| Altered liver test                             | 57  | None                            | CT and US         | Heterogeneous liver parenchyma         | Thrombocytopenia             | hepat. lobular carcinoma             | 5                |
| Clinical signs of hepatocellular injury        | 55  | Basal cell carcinoma            | Liver MRI         | Hepatomegaly                           | None reported                | Basal cell carcinoma                 | 14               |
| Anorexia and abdominal distension              | 62  | None                            | US and CT         | Hepatomegaly and ascites.              | Elevated CA-125              | Melanoma                             | 15               |
| Abnormal liver function;                       | 62  | None                            | CT and MRI        | Marked liver enlargement, no lesions   | increased LFT                | Small-cell lung cancer               | 6                |
| Acute hepatic failure                          | 66  | None                            | CT scan           | Negative                               | high LFTs                    | Metastatic prostatic carcinoma.      | 16               |
| Gastrointestinal hemorrhage                    | 65  | None                            | CT                | No liver metastatic disease            | LFT elevation                | Urothelial carcinoma                 | 8                |
| Acute severe hepatic failure                   | 72  | T-cell lymphoma                 | CT & US           | Homogeneous enlarged liver, no ascites | BUN 5.1, increase LFTs       | Small cell carcinoma                 | 11               |
| Infants with hepatosplenomegaly                | 05  | None                            | CT, MRI           | Liver enlargement                      | No hepatic amines            | Neuroblastoma                        | 9                |
